# Supplementary material
Source: Springer Nature journal article supplement (https://www.springermedizin.de/resource/supplementary/13063_2013_2105_MOESM1_ESM.pdf/9621390)
Supplement: MOESM1 [file 9621390]

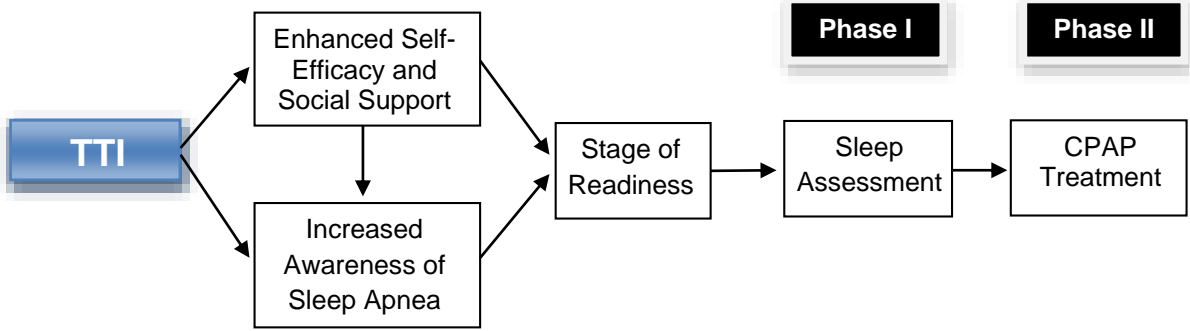

**TTI**

Enhanced Self-Efficacy and Social Support

Increased Awareness of Sleep Apnea

Stage of Readiness

Sleep Assessment

CPAP Treatment

**Phase I**

**Phase II**
